# Supplementary material for: Biradical o-iminobenzosemiquinonato(1−) complexes of nickel(ii): catalytic activity in three-component coupling of aldehydes, amines and alkynes
Source: Royal Society of Chemistry journal article supplement (doi:10.1039/d0ra10248b), 2021-01-01
Supplement: d0ra10248b1.pdf [file d0ra10248b1.pdf]

## Biradical *o*-Iminobenzosemiquinonato(1-) Complexes of Nickel(II): Catalytic Activity in Three-Component Coupling of Aldehydes, Amines and Alkynes

Mina Nasibipour <sup>a</sup>, Elham Safaei <sup>a,\*</sup>, Ali Moaddeli <sup>a</sup>, Marziyeh Sadat Masoumpour <sup>b</sup>, Andrzej Wojtczak <sup>c</sup>

<sup>a</sup> Department of Chemistry, College of Sciences, Shiraz University, 71454, Shiraz, Iran

<sup>b</sup> Department of Chemistry, Estahban Higher Education Center, Estahban 74519-44655, Iran

<sup>c</sup> Nicolaus Copernicus University, Faculty of Chemistry, 87-100 Torun, Poland

| Contents                                                                                                                                      | Page |
|-----------------------------------------------------------------------------------------------------------------------------------------------|------|
| Figure S1 IR spectrum of Ni <sup>II</sup> L <sub>2</sub> <sup>BIS</sup> .                                                                     | S2   |
| Table S1 Crystallographic data and structure refinement of Ni <sup>II</sup> L <sub>2</sub> <sup>BIS</sup> .                                   | S2   |
| Table S2 Bond distances (Å) and bond angles (°) Ni <sup>II</sup> L <sub>2</sub> <sup>BIS</sup> .                                              | S3   |
| Table S3 Torsion angles [°] for Ni <sup>II</sup> L <sub>2</sub> <sup>NIS</sup> .                                                              | S6   |
| Table S4 Selected bond lengths of optimized structure of Ni <sup>II</sup> L <sub>2</sub> <sup>BIS</sup> .                                     | S9   |
| Figure S2 Absorption and emission spectrums of the 0.1mM CH <sub>2</sub> Cl <sub>2</sub> solutions of H <sub>2</sub> L <sup>BAP</sup> ligand. | S10  |
| Figure S3 <sup>1</sup> H NMR and <sup>13</sup> C NMR of 2.5.1 1-(1-(Naphthalen-1-yl)-3-phenylprop-2-yn-1-yl)pyrrolidine.                      | S10  |
| Figure S4 IR spectrum of 2.5.1 1-(1-(Naphthalen-1-yl)-3-phenylprop-2-yn-1-yl)pyrrolidine.                                                     | S10  |
| Figure S5 <sup>1</sup> H NMR of 1-(1-(3,5-Dimethoxyphenyl)-3-phenylprop-2-yn-1-yl)pyrrolidine.                                                | S11  |
| Figure S6 IR spectrum of 1-(1-(3,5-Dimethoxyphenyl)-3-phenylprop-2-yn-1-yl)pyrrolidine.                                                       | S11  |
| Figure S7 <sup>1</sup> H NMR and <sup>13</sup> C NMR of 4-(1-(4-Chlorophenyl)-3-phenylprop-2-yn-1-yl)morpholine.                              | S12  |
| Figure S8 IR spectrum of 4-(1-(4-Chlorophenyl)-3-phenylprop-2-yn-1-yl)morpholine.                                                             | S12  |
| Figure S9 <sup>1</sup> H NMR and <sup>13</sup> C NMR of 1-Benzyl-4-(1-(naphthalen-1-yl)-3-phenylprop-2-yn-1-yl) piperazine.                   | S13  |
| Figure S10 IR spectrum of 1-Benzyl-4-(1-(naphthalen-1-yl)-3-phenylprop-2-yn-1-yl) piperazine.                                                 | S13  |
| Figure S11 <sup>1</sup> H NMR of 1-benzyl-4-(1-(4-bromophenyl)-3-phenylprop-2-yn-1-yl)piperazine.                                             | S14  |
| Figure S12 IR spectrum of 1-(1,3-diphenylprop-2-yn-1-yl)pyrrolidine.                                                                          | S14  |
| Figure S13 IR spectrum of 1-(1-(3-nitrophenyl)-3-phenylprop-2-yn-1-yl)morpholine.                                                             | S14  |
| Figure S14 IR spectrum of 4-(1-(4-Bromophenyl)-3-phenylprop-2-yn-1-yl)morpholine.                                                             | S15  |
| Figure S15 IR spectrum of 1-(1,3-diphenylprop-2-yn-1-yl)Piperidine.                                                                           | S15  |
| Figure S16 IR spectrum of 4-(1-(4-Chlorophenyl)-3-phenylprop-2-yn-1-yl)Piperidine.                                                            | S15  |

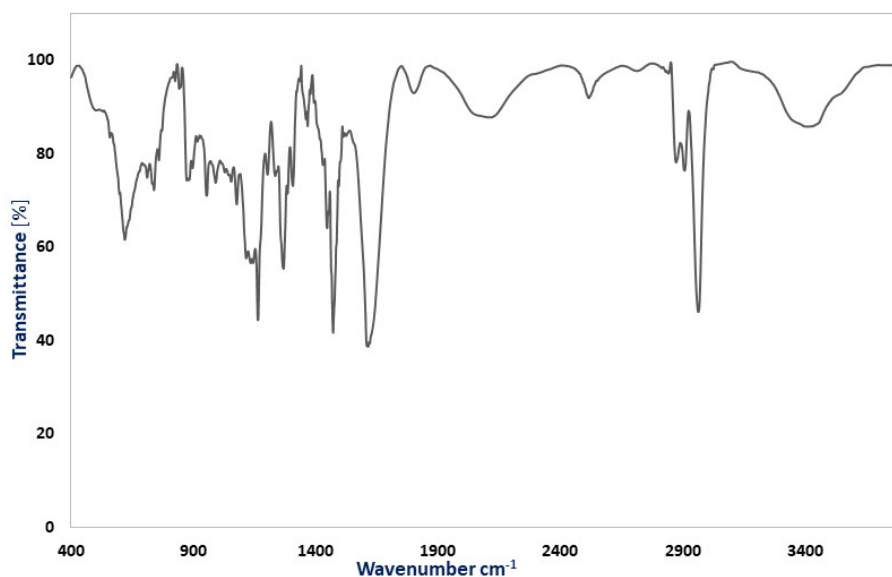

Figure S1 IR spectrum of Ni<sup>II</sup>L<sub>2</sub><sup>BIS</sup>.

Table S1 Crystal data and structure refinement for Ni<sup>II</sup>L<sub>2</sub><sup>BIS</sup>.

|                                                |                                             |
|------------------------------------------------|---------------------------------------------|
| Identification code                            | e1464a_sq                                   |
| Empirical formula                              | C70 H88 N4 Ni O4                            |
| Formula weight                                 | 1108.15                                     |
| Temperature; K                                 | 293(2)                                      |
| Wavelength; Å                                  | 0.71073                                     |
| Crystal system                                 | Monoclinic                                  |
| Space group                                    | P2 <sub>1</sub> /n                          |
| Unit cell dimensions; Å, °                     | a = 18.1423(6)                              |
|                                                | b = 17.5195(5)                              |
|                                                | c = 23.9371(9)                              |
|                                                | α = 90                                      |
|                                                | β = 106.001(3)                              |
|                                                | γ = 90                                      |
| Volume; Å <sup>3</sup>                         | 7313.5(4)                                   |
| Z                                              | 4                                           |
| Density (calculated); Mg/m <sup>3</sup>        | 1.006                                       |
| Absorption coefficient; mm <sup>-1</sup>       | 0.308                                       |
| F(000)                                         | 2384                                        |
| Crystal size; mm                               | 0.793 x 0.564 x 0.517                       |
| Theta range for data collection                | 2.325 to 28.366°.                           |
| Index ranges                                   | -22 ≤ h ≤ 21, -22 ≤ k ≤ 22, -31 ≤ l ≤ 29    |
| Reflections collected                          | 52213                                       |
| Independent reflections                        | 16548 [R(int) = 0.0442]                     |
| Completeness to theta = 25.242°                | 99.9 %                                      |
| Absorption correction                          | Analytical                                  |
| Max. and min. transmission                     | 0.883 and 0.839                             |
| Refinement method                              | Full-matrix least-squares on F <sup>2</sup> |
| Data / restraints / parameters                 | 16548 / 0 / 712                             |
| Goodness-of-fit on F <sup>2</sup>              | 1.040                                       |
| Final R indices [I > 2σ(I)]                    | R1 = 0.0614, wR2 = 0.1426                   |
| R indices (all data)                           | R1 = 0.1017, wR2 = 0.1725                   |
| Largest diff. peak and hole; e.Å <sup>-3</sup> | 0.649 and -0.271                            |

**Table 2** Bond lengths [Å] and angles [°] for Ni<sup>II</sup>L<sub>2</sub><sup>BIS</sup>.

|             |            |
|-------------|------------|
| Ni(1)-N(41) | 2.0193(19) |
| Ni(1)-N(1)  | 2.027(2)   |
| Ni(1)-O(41) | 2.0425(18) |
| Ni(1)-O(1)  | 2.0466(19) |
| Ni(1)-N(2)  | 2.143(2)   |
| Ni(1)-N(42) | 2.153(2)   |
| O(1)-C(1)   | 1.286(3)   |
| C(1)-C(2)   | 1.446(4)   |
| C(1)-C(6)   | 1.466(4)   |
| C(2)-C(3)   | 1.375(4)   |
| C(2)-C(20)  | 1.536(5)   |
| C(3)-C(4)   | 1.427(5)   |
| C(4)-C(5)   | 1.368(5)   |
| C(4)-C(24)  | 1.547(4)   |
| C(5)-C(6)   | 1.428(4)   |
| C(6)-N(1)   | 1.355(4)   |
| N(1)-C(7)   | 1.398(4)   |
| C(7)-C(8)   | 1.412(4)   |
| C(7)-C(12)  | 1.414(4)   |
| C(8)-C(9)   | 1.376(5)   |
| C(9)-C(10)  | 1.371(6)   |
| C(10)-C(11) | 1.388(5)   |
| C(11)-C(12) | 1.395(4)   |
| C(12)-C(13) | 1.469(4)   |
| C(13)-N(2)  | 1.302(3)   |
| C(13)-O(2)  | 1.372(3)   |
| N(2)-C(14)  | 1.411(3)   |
| C(14)-C(19) | 1.381(4)   |
| C(14)-C(15) | 1.396(4)   |
| C(15)-C(16) | 1.395(4)   |
| C(16)-C(17) | 1.405(4)   |
| C(16)-C(28) | 1.548(4)   |
| C(17)-C(18) | 1.397(4)   |
| C(18)-C(19) | 1.400(4)   |
| C(18)-C(32) | 1.521(4)   |
| C(19)-O(2)  | 1.392(3)   |
| C(20)-C(21) | 1.530(6)   |
| C(20)-C(23) | 1.551(5)   |
| C(20)-C(22) | 1.556(5)   |
| C(24)-C(25) | 1.461(7)   |
| C(24)-C(27) | 1.474(8)   |
| C(24)-C(26) | 1.575(8)   |
| C(28)-C(29) | 1.448(7)   |
| C(28)-C(30) | 1.463(6)   |
| C(28)-C(31) | 1.527(8)   |
| C(32)-C(35) | 1.513(5)   |
| C(32)-C(33) | 1.523(6)   |
| C(32)-C(34) | 1.551(5)   |
| O(41)-C(41) | 1.283(3)   |
| C(41)-C(42) | 1.452(4)   |
| C(41)-C(46) | 1.465(3)   |
| C(42)-C(43) | 1.369(4)   |
| C(42)-C(60) | 1.546(4)   |
| C(43)-C(44) | 1.430(4)   |
| C(44)-C(45) | 1.375(4)   |
| C(44)-C(64) | 1.536(4)   |
| C(45)-C(46) | 1.420(3)   |
| C(46)-N(41) | 1.363(3)   |
| N(41)-C(47) | 1.394(3)   |
| C(47)-C(48) | 1.401(4)   |
| C(47)-C(52) | 1.418(3)   |
| C(48)-C(49) | 1.386(4)   |
| C(49)-C(50) | 1.384(5)   |
| C(50)-C(51) | 1.377(4)   |
| C(51)-C(52) | 1.405(4)   |
| C(52)-C(53) | 1.465(3)   |
| C(53)-N(42) | 1.306(3)   |
| C(53)-O(42) | 1.371(3)   |
| N(42)-C(54) | 1.415(3)   |
| C(54)-C(59) | 1.382(4)   |
| C(54)-C(55) | 1.392(4)   |
| C(55)-C(56) | 1.396(4)   |

|                   |            |
|-------------------|------------|
| C(56)-C(57)       | 1.405(4)   |
| C(56)-C(68)       | 1.547(4)   |
| C(57)-C(58)       | 1.396(4)   |
| C(58)-C(59)       | 1.397(4)   |
| C(58)-C(72)       | 1.535(4)   |
| C(59)-O(42)       | 1.392(3)   |
| C(60)-C(62)       | 1.536(6)   |
| C(60)-C(61)       | 1.543(6)   |
| C(60)-C(63)       | 1.546(5)   |
| C(64)-C(65)       | 1.536(5)   |
| C(64)-C(67)       | 1.538(5)   |
| C(64)-C(66)       | 1.542(5)   |
| C(68)-C(69)       | 1.504(6)   |
| C(68)-C(70)       | 1.509(7)   |
| C(68)-C(71)       | 1.517(7)   |
| C(72)-C(74)       | 1.525(6)   |
| C(72)-C(75)       | 1.527(6)   |
| C(72)-C(73)       | 1.540(5)   |
| N(41)-Ni(1)-N(1)  | 171.41(9)  |
| N(41)-Ni(1)-O(41) | 80.73(7)   |
| N(1)-Ni(1)-O(41)  | 93.90(8)   |
| N(41)-Ni(1)-O(1)  | 94.40(8)   |
| N(1)-Ni(1)-O(1)   | 80.16(8)   |
| O(41)-Ni(1)-O(1)  | 102.55(8)  |
| N(41)-Ni(1)-N(2)  | 98.03(8)   |
| N(1)-Ni(1)-N(2)   | 88.61(9)   |
| O(41)-Ni(1)-N(2)  | 89.99(8)   |
| O(1)-Ni(1)-N(2)   | 163.62(8)  |
| N(41)-Ni(1)-N(42) | 88.14(8)   |
| N(1)-Ni(1)-N(42)  | 98.28(8)   |
| O(41)-Ni(1)-N(42) | 164.88(8)  |
| O(1)-Ni(1)-N(42)  | 88.40(8)   |
| N(2)-Ni(1)-N(42)  | 81.41(8)   |
| C(1)-O(1)-Ni(1)   | 111.03(17) |
| O(1)-C(1)-C(2)    | 122.8(3)   |
| O(1)-C(1)-C(6)    | 117.5(2)   |
| C(2)-C(1)-C(6)    | 119.7(2)   |
| C(3)-C(2)-C(1)    | 116.8(3)   |
| C(3)-C(2)-C(20)   | 123.8(3)   |
| C(1)-C(2)-C(20)   | 119.4(3)   |
| C(2)-C(3)-C(4)    | 124.9(3)   |
| C(5)-C(4)-C(3)    | 118.6(3)   |
| C(5)-C(4)-C(24)   | 121.3(4)   |
| C(3)-C(4)-C(24)   | 120.1(4)   |
| C(4)-C(5)-C(6)    | 121.2(3)   |
| N(1)-C(6)-C(5)    | 126.6(3)   |
| N(1)-C(6)-C(1)    | 114.3(2)   |
| C(5)-C(6)-C(1)    | 118.8(3)   |
| C(6)-N(1)-C(7)    | 123.3(2)   |
| C(6)-N(1)-Ni(1)   | 111.56(17) |
| C(7)-N(1)-Ni(1)   | 124.81(19) |
| N(1)-C(7)-C(8)    | 122.6(3)   |
| N(1)-C(7)-C(12)   | 120.1(2)   |
| C(8)-C(7)-C(12)   | 117.1(3)   |
| C(9)-C(8)-C(7)    | 121.2(4)   |
| C(10)-C(9)-C(8)   | 121.3(3)   |
| C(9)-C(10)-C(11)  | 119.3(4)   |
| C(10)-C(11)-C(12) | 120.7(4)   |
| C(11)-C(12)-C(7)  | 120.4(3)   |
| C(11)-C(12)-C(13) | 118.0(3)   |
| C(7)-C(12)-C(13)  | 121.6(2)   |
| N(2)-C(13)-O(2)   | 114.4(2)   |
| N(2)-C(13)-C(12)  | 128.6(3)   |
| O(2)-C(13)-C(12)  | 117.0(2)   |
| C(13)-N(2)-C(14)  | 105.1(2)   |
| C(13)-N(2)-Ni(1)  | 119.78(18) |
| C(14)-N(2)-Ni(1)  | 130.06(17) |
| C(19)-C(14)-C(15) | 121.0(3)   |
| C(19)-C(14)-N(2)  | 108.2(2)   |
| C(15)-C(14)-N(2)  | 130.8(3)   |
| C(16)-C(15)-C(14) | 117.6(3)   |
| C(15)-C(16)-C(17) | 119.0(3)   |
| C(15)-C(16)-C(28) | 119.7(3)   |

|                   |            |
|-------------------|------------|
| C(17)-C(16)-C(28) | 121.2(3)   |
| C(18)-C(17)-C(16) | 125.4(3)   |
| C(17)-C(18)-C(19) | 112.6(3)   |
| C(17)-C(18)-C(32) | 124.3(3)   |
| C(19)-C(18)-C(32) | 123.0(3)   |
| C(14)-C(19)-O(2)  | 107.8(2)   |
| C(14)-C(19)-C(18) | 124.4(3)   |
| O(2)-C(19)-C(18)  | 127.8(3)   |
| C(13)-O(2)-C(19)  | 104.4(2)   |
| C(21)-C(20)-C(2)  | 110.4(3)   |
| C(21)-C(20)-C(23) | 108.3(4)   |
| C(2)-C(20)-C(23)  | 111.8(3)   |
| C(21)-C(20)-C(22) | 110.2(3)   |
| C(2)-C(20)-C(22)  | 108.7(3)   |
| C(23)-C(20)-C(22) | 107.4(3)   |
| C(25)-C(24)-C(27) | 116.8(6)   |
| C(25)-C(24)-C(4)  | 111.1(4)   |
| C(27)-C(24)-C(4)  | 110.1(4)   |
| C(25)-C(24)-C(26) | 105.6(6)   |
| C(27)-C(24)-C(26) | 101.7(5)   |
| C(4)-C(24)-C(26)  | 111.1(4)   |
| C(29)-C(28)-C(30) | 113.5(6)   |
| C(29)-C(28)-C(31) | 106.5(6)   |
| C(30)-C(28)-C(31) | 103.9(5)   |
| C(29)-C(28)-C(16) | 108.9(4)   |
| C(30)-C(28)-C(16) | 113.1(3)   |
| C(31)-C(28)-C(16) | 110.7(4)   |
| C(35)-C(32)-C(18) | 112.2(3)   |
| C(35)-C(32)-C(33) | 110.0(4)   |
| C(18)-C(32)-C(33) | 111.0(3)   |
| C(35)-C(32)-C(34) | 108.9(3)   |
| C(18)-C(32)-C(34) | 107.6(3)   |
| C(33)-C(32)-C(34) | 106.9(4)   |
| C(41)-O(41)-Ni(1) | 111.27(15) |
| O(41)-C(41)-C(42) | 123.2(2)   |
| O(41)-C(41)-C(46) | 118.6(2)   |
| C(42)-C(41)-C(46) | 118.2(2)   |
| C(43)-C(42)-C(41) | 117.8(3)   |
| C(43)-C(42)-C(60) | 123.6(3)   |
| C(41)-C(42)-C(60) | 118.6(3)   |
| C(42)-C(43)-C(44) | 124.7(3)   |
| C(45)-C(44)-C(43) | 118.1(2)   |
| C(45)-C(44)-C(64) | 122.5(3)   |
| C(43)-C(44)-C(64) | 119.4(2)   |
| C(44)-C(45)-C(46) | 121.2(2)   |
| N(41)-C(46)-C(45) | 126.3(2)   |
| N(41)-C(46)-C(41) | 113.8(2)   |
| C(45)-C(46)-C(41) | 119.9(2)   |
| C(46)-N(41)-C(47) | 122.0(2)   |
| C(46)-N(41)-Ni(1) | 111.79(15) |
| C(47)-N(41)-Ni(1) | 125.67(15) |
| N(41)-C(47)-C(48) | 122.1(2)   |
| N(41)-C(47)-C(52) | 120.3(2)   |
| C(48)-C(47)-C(52) | 117.5(2)   |
| C(49)-C(48)-C(47) | 121.6(3)   |
| C(50)-C(49)-C(48) | 120.6(3)   |
| C(51)-C(50)-C(49) | 119.1(3)   |
| C(50)-C(51)-C(52) | 121.4(3)   |
| C(51)-C(52)-C(47) | 119.5(2)   |
| C(51)-C(52)-C(53) | 118.3(2)   |
| C(47)-C(52)-C(53) | 122.2(2)   |
| N(42)-C(53)-O(42) | 114.2(2)   |
| N(42)-C(53)-C(52) | 128.8(2)   |
| O(42)-C(53)-C(52) | 116.9(2)   |
| C(53)-N(42)-C(54) | 105.2(2)   |
| C(53)-N(42)-Ni(1) | 120.77(16) |
| C(54)-N(42)-Ni(1) | 131.18(17) |
| C(59)-C(54)-C(55) | 121.0(2)   |
| C(59)-C(54)-N(42) | 108.1(2)   |
| C(55)-C(54)-N(42) | 130.9(2)   |
| C(54)-C(55)-C(56) | 117.8(3)   |
| C(55)-C(56)-C(57) | 118.8(3)   |
| C(55)-C(56)-C(68) | 121.1(3)   |

|                   |          |
|-------------------|----------|
| C(57)-C(56)-C(68) | 120.1(3) |
| C(58)-C(57)-C(56) | 125.3(3) |
| C(57)-C(58)-C(59) | 112.9(3) |
| C(57)-C(58)-C(72) | 124.7(3) |
| C(59)-C(58)-C(72) | 122.4(3) |
| C(54)-C(59)-O(42) | 107.8(2) |
| C(54)-C(59)-C(58) | 124.2(3) |
| O(42)-C(59)-C(58) | 128.0(3) |
| C(62)-C(60)-C(61) | 110.8(4) |
| C(62)-C(60)-C(63) | 107.3(4) |
| C(61)-C(60)-C(63) | 108.7(4) |
| C(62)-C(60)-C(42) | 110.2(3) |
| C(61)-C(60)-C(42) | 108.6(3) |
| C(63)-C(60)-C(42) | 111.2(3) |
| C(44)-C(64)-C(65) | 111.9(3) |
| C(44)-C(64)-C(67) | 110.5(3) |
| C(65)-C(64)-C(67) | 108.7(3) |
| C(44)-C(64)-C(66) | 108.8(3) |
| C(65)-C(64)-C(66) | 107.9(3) |
| C(67)-C(64)-C(66) | 109.0(3) |
| C(69)-C(68)-C(70) | 108.5(4) |
| C(69)-C(68)-C(71) | 108.0(4) |
| C(70)-C(68)-C(71) | 109.0(5) |
| C(69)-C(68)-C(56) | 111.8(3) |
| C(70)-C(68)-C(56) | 111.7(3) |
| C(71)-C(68)-C(56) | 107.8(4) |
| C(74)-C(72)-C(75) | 109.0(4) |
| C(74)-C(72)-C(58) | 108.5(3) |
| C(75)-C(72)-C(58) | 109.7(3) |
| C(74)-C(72)-C(73) | 109.1(4) |
| C(75)-C(72)-C(73) | 108.8(4) |
| C(58)-C(72)-C(73) | 111.7(3) |

**Table 3** Torsion angles [°] for Ni<sup>II</sup>L<sub>2</sub><sup>BIS</sup>.

|                         |           |
|-------------------------|-----------|
| Ni(1)-O(1)-C(1)-C(2)    | 159.9(2)  |
| Ni(1)-O(1)-C(1)-C(6)    | -20.2(3)  |
| O(1)-C(1)-C(2)-C(3)     | -179.1(3) |
| C(6)-C(1)-C(2)-C(3)     | 1.0(4)    |
| O(1)-C(1)-C(2)-C(20)    | -0.9(4)   |
| C(6)-C(1)-C(2)-C(20)    | 179.2(3)  |
| C(1)-C(2)-C(3)-C(4)     | -0.5(5)   |
| C(20)-C(2)-C(3)-C(4)    | -178.6(3) |
| C(2)-C(3)-C(4)-C(5)     | -0.9(5)   |
| C(2)-C(3)-C(4)-C(24)    | 176.8(3)  |
| C(3)-C(4)-C(5)-C(6)     | 1.7(5)    |
| C(24)-C(4)-C(5)-C(6)    | -176.0(3) |
| C(4)-C(5)-C(6)-N(1)     | 172.7(3)  |
| C(4)-C(5)-C(6)-C(1)     | -1.2(4)   |
| O(1)-C(1)-C(6)-N(1)     | 5.3(4)    |
| C(2)-C(1)-C(6)-N(1)     | -174.8(2) |
| O(1)-C(1)-C(6)-C(5)     | 179.9(2)  |
| C(2)-C(1)-C(6)-C(5)     | -0.2(4)   |
| C(5)-C(6)-N(1)-C(7)     | 24.6(4)   |
| C(1)-C(6)-N(1)-C(7)     | -161.4(2) |
| C(5)-C(6)-N(1)-Ni(1)    | -161.3(2) |
| C(1)-C(6)-N(1)-Ni(1)    | 12.7(3)   |
| C(6)-N(1)-C(7)-C(8)     | 34.9(4)   |
| Ni(1)-N(1)-C(7)-C(8)    | -138.4(3) |
| C(6)-N(1)-C(7)-C(12)    | -148.8(3) |
| Ni(1)-N(1)-C(7)-C(12)   | 37.8(4)   |
| N(1)-C(7)-C(8)-C(9)     | 178.3(4)  |
| C(12)-C(7)-C(8)-C(9)    | 1.9(5)    |
| C(7)-C(8)-C(9)-C(10)    | 0.6(7)    |
| C(8)-C(9)-C(10)-C(11)   | -1.9(8)   |
| C(9)-C(10)-C(11)-C(12)  | 0.5(8)    |
| C(10)-C(11)-C(12)-C(7)  | 2.1(6)    |
| C(10)-C(11)-C(12)-C(13) | -176.9(4) |

|                         |             |
|-------------------------|-------------|
| N(1)-C(7)-C(12)-C(11)   | -179.7(3)   |
| C(8)-C(7)-C(12)-C(11)   | -3.3(5)     |
| N(1)-C(7)-C(12)-C(13)   | -0.8(4)     |
| C(8)-C(7)-C(12)-C(13)   | 175.7(3)    |
| C(11)-C(12)-C(13)-N(2)  | 144.3(3)    |
| C(7)-C(12)-C(13)-N(2)   | -34.7(5)    |
| C(11)-C(12)-C(13)-O(2)  | -33.3(4)    |
| C(7)-C(12)-C(13)-O(2)   | 147.7(3)    |
| O(2)-C(13)-N(2)-C(14)   | 0.8(3)      |
| C(12)-C(13)-N(2)-C(14)  | -176.8(3)   |
| O(2)-C(13)-N(2)-Ni(1)   | -156.58(18) |
| C(12)-C(13)-N(2)-Ni(1)  | 25.8(4)     |
| C(13)-N(2)-C(14)-C(19)  | -1.0(3)     |
| Ni(1)-N(2)-C(14)-C(19)  | 153.10(19)  |
| C(13)-N(2)-C(14)-C(15)  | 177.2(3)    |
| Ni(1)-N(2)-C(14)-C(15)  | -28.6(4)    |
| C(19)-C(14)-C(15)-C(16) | -0.8(4)     |
| N(2)-C(14)-C(15)-C(16)  | -178.8(3)   |
| C(14)-C(15)-C(16)-C(17) | -0.6(4)     |
| C(14)-C(15)-C(16)-C(28) | 176.2(3)    |
| C(15)-C(16)-C(17)-C(18) | 0.7(5)      |
| C(28)-C(16)-C(17)-C(18) | -176.0(3)   |
| C(16)-C(17)-C(18)-C(19) | 0.6(4)      |
| C(16)-C(17)-C(18)-C(32) | -179.3(3)   |
| C(15)-C(14)-C(19)-O(2)  | -177.5(2)   |
| N(2)-C(14)-C(19)-O(2)   | 0.9(3)      |
| C(15)-C(14)-C(19)-C(18) | 2.3(4)      |
| N(2)-C(14)-C(19)-C(18)  | -179.2(3)   |
| C(17)-C(18)-C(19)-C(14) | -2.1(4)     |
| C(32)-C(18)-C(19)-C(14) | 177.7(3)    |
| C(17)-C(18)-C(19)-O(2)  | 177.7(3)    |
| C(32)-C(18)-C(19)-O(2)  | -2.4(5)     |
| N(2)-C(13)-O(2)-C(19)   | -0.2(3)     |
| C(12)-C(13)-O(2)-C(19)  | 177.6(2)    |
| C(14)-C(19)-O(2)-C(13)  | -0.4(3)     |
| C(18)-C(19)-O(2)-C(13)  | 179.7(3)    |
| C(3)-C(2)-C(20)-C(21)   | -120.1(4)   |
| C(1)-C(2)-C(20)-C(21)   | 61.9(4)     |
| C(3)-C(2)-C(20)-C(23)   | 0.6(5)      |
| C(1)-C(2)-C(20)-C(23)   | -177.4(3)   |
| C(3)-C(2)-C(20)-C(22)   | 119.0(4)    |
| C(1)-C(2)-C(20)-C(22)   | -59.0(4)    |
| C(5)-C(4)-C(24)-C(25)   | -119.0(6)   |
| C(3)-C(4)-C(24)-C(25)   | 63.5(7)     |
| C(5)-C(4)-C(24)-C(27)   | 110.1(6)    |
| C(3)-C(4)-C(24)-C(27)   | -67.5(6)    |
| C(5)-C(4)-C(24)-C(26)   | -1.7(6)     |
| C(3)-C(4)-C(24)-C(26)   | -179.3(4)   |
| C(15)-C(16)-C(28)-C(29) | -92.7(6)    |
| C(17)-C(16)-C(28)-C(29) | 84.0(7)     |
| C(15)-C(16)-C(28)-C(30) | 34.5(6)     |
| C(17)-C(16)-C(28)-C(30) | -148.7(5)   |
| C(15)-C(16)-C(28)-C(31) | 150.6(5)    |
| C(17)-C(16)-C(28)-C(31) | -32.7(6)    |
| C(17)-C(18)-C(32)-C(35) | -4.2(5)     |
| C(19)-C(18)-C(32)-C(35) | 176.0(4)    |
| C(17)-C(18)-C(32)-C(33) | -127.7(4)   |
| C(19)-C(18)-C(32)-C(33) | 52.5(4)     |
| C(17)-C(18)-C(32)-C(34) | 115.6(4)    |
| C(19)-C(18)-C(32)-C(34) | -64.2(4)    |
| Ni(1)-O(41)-C(41)-C(42) | 166.3(2)    |
| Ni(1)-O(41)-C(41)-C(46) | -15.2(3)    |
| O(41)-C(41)-C(42)-C(43) | -179.9(3)   |
| C(46)-C(41)-C(42)-C(43) | 1.6(4)      |

|                         |             |
|-------------------------|-------------|
| O(41)-C(41)-C(42)-C(60) | 0.8(4)      |
| C(46)-C(41)-C(42)-C(60) | -177.7(3)   |
| C(41)-C(42)-C(43)-C(44) | 1.1(5)      |
| C(60)-C(42)-C(43)-C(44) | -179.7(3)   |
| C(42)-C(43)-C(44)-C(45) | -2.5(5)     |
| C(42)-C(43)-C(44)-C(64) | 179.0(3)    |
| C(43)-C(44)-C(45)-C(46) | 1.1(4)      |
| C(64)-C(44)-C(45)-C(46) | 179.5(3)    |
| C(44)-C(45)-C(46)-N(41) | 178.1(3)    |
| C(44)-C(45)-C(46)-C(41) | 1.5(4)      |
| O(41)-C(41)-C(46)-N(41) | 1.6(3)      |
| C(42)-C(41)-C(46)-N(41) | -179.9(2)   |
| O(41)-C(41)-C(46)-C(45) | 178.6(2)    |
| C(42)-C(41)-C(46)-C(45) | -2.9(4)     |
| C(45)-C(46)-N(41)-C(47) | 24.4(4)     |
| C(41)-C(46)-N(41)-C(47) | -158.8(2)   |
| C(45)-C(46)-N(41)-Ni(1) | -163.6(2)   |
| C(41)-C(46)-N(41)-Ni(1) | 13.1(3)     |
| C(46)-N(41)-C(47)-C(48) | 34.3(4)     |
| Ni(1)-N(41)-C(47)-C(48) | -136.5(2)   |
| C(46)-N(41)-C(47)-C(52) | -150.5(2)   |
| Ni(1)-N(41)-C(47)-C(52) | 38.7(3)     |
| N(41)-C(47)-C(48)-C(49) | 178.9(3)    |
| C(52)-C(47)-C(48)-C(49) | 3.5(5)      |
| C(47)-C(48)-C(49)-C(50) | 1.3(6)      |
| C(48)-C(49)-C(50)-C(51) | -3.3(6)     |
| C(49)-C(50)-C(51)-C(52) | 0.3(6)      |
| C(50)-C(51)-C(52)-C(47) | 4.6(5)      |
| C(50)-C(51)-C(52)-C(53) | -172.7(3)   |
| N(41)-C(47)-C(52)-C(51) | 178.2(2)    |
| C(48)-C(47)-C(52)-C(51) | -6.4(4)     |
| N(41)-C(47)-C(52)-C(53) | -4.6(4)     |
| C(48)-C(47)-C(52)-C(53) | 170.9(3)    |
| C(51)-C(52)-C(53)-N(42) | 149.1(3)    |
| C(47)-C(52)-C(53)-N(42) | -28.2(4)    |
| C(51)-C(52)-C(53)-O(42) | -26.3(4)    |
| C(47)-C(52)-C(53)-O(42) | 156.4(2)    |
| O(42)-C(53)-N(42)-C(54) | 0.1(3)      |
| C(52)-C(53)-N(42)-C(54) | -175.4(2)   |
| O(42)-C(53)-N(42)-Ni(1) | -162.83(16) |
| C(52)-C(53)-N(42)-Ni(1) | 21.7(4)     |
| C(53)-N(42)-C(54)-C(59) | -0.3(3)     |
| Ni(1)-N(42)-C(54)-C(59) | 160.06(19)  |
| C(53)-N(42)-C(54)-C(55) | 178.3(3)    |
| Ni(1)-N(42)-C(54)-C(55) | -21.3(4)    |
| C(59)-C(54)-C(55)-C(56) | -0.7(4)     |
| N(42)-C(54)-C(55)-C(56) | -179.1(3)   |
| C(54)-C(55)-C(56)-C(57) | -0.8(5)     |
| C(54)-C(55)-C(56)-C(68) | 176.1(3)    |
| C(55)-C(56)-C(57)-C(58) | 1.0(5)      |
| C(68)-C(56)-C(57)-C(58) | -176.0(3)   |
| C(56)-C(57)-C(58)-C(59) | 0.3(5)      |
| C(56)-C(57)-C(58)-C(72) | -177.9(3)   |
| C(55)-C(54)-C(59)-O(42) | -178.3(3)   |
| N(42)-C(54)-C(59)-O(42) | 0.5(3)      |
| C(55)-C(54)-C(59)-C(58) | 2.2(5)      |
| N(42)-C(54)-C(59)-C(58) | -179.1(3)   |
| C(57)-C(58)-C(59)-C(54) | -1.9(4)     |
| C(72)-C(58)-C(59)-C(54) | 176.4(3)    |
| C(57)-C(58)-C(59)-O(42) | 178.7(3)    |
| C(72)-C(58)-C(59)-O(42) | -3.1(5)     |
| N(42)-C(53)-O(42)-C(59) | 0.2(3)      |
| C(52)-C(53)-O(42)-C(59) | 176.3(2)    |
| C(54)-C(59)-O(42)-C(53) | -0.4(3)     |



|                         |           |
|-------------------------|-----------|
| C(58)-C(59)-O(42)-C(53) | 179.1(3)  |
| C(43)-C(42)-C(60)-C(62) | 120.8(4)  |
| C(41)-C(42)-C(60)-C(62) | -59.9(4)  |
| C(43)-C(42)-C(60)-C(61) | -117.6(4) |
| C(41)-C(42)-C(60)-C(61) | 61.6(4)   |
| C(43)-C(42)-C(60)-C(63) | 2.0(5)    |
| C(41)-C(42)-C(60)-C(63) | -178.8(4) |
| C(45)-C(44)-C(64)-C(65) | 3.5(4)    |
| C(43)-C(44)-C(64)-C(65) | -178.1(3) |
| C(45)-C(44)-C(64)-C(67) | 124.8(4)  |
| C(43)-C(44)-C(64)-C(67) | -56.8(4)  |
| C(45)-C(44)-C(64)-C(66) | -115.6(3) |
| C(43)-C(44)-C(64)-C(66) | 62.8(4)   |
| C(55)-C(56)-C(68)-C(69) | 139.1(4)  |
| C(57)-C(56)-C(68)-C(69) | -44.0(5)  |
| C(55)-C(56)-C(68)-C(70) | 17.3(6)   |
| C(57)-C(56)-C(68)-C(70) | -165.8(5) |
| C(55)-C(56)-C(68)-C(71) | -102.4(5) |
| C(57)-C(56)-C(68)-C(71) | 74.5(5)   |
| C(57)-C(58)-C(72)-C(74) | 116.2(4)  |
| C(59)-C(58)-C(72)-C(74) | -61.9(5)  |
| C(57)-C(58)-C(72)-C(75) | -124.9(4) |
| C(59)-C(58)-C(72)-C(75) | 57.0(5)   |
| C(57)-C(58)-C(72)-C(73) | -4.2(5)   |
| C(59)-C(58)-C(72)-C(73) | 177.8(4)  |

Symmetry transformations used to generate equivalent atoms

| Table S4 Selected bond lengths of optimized structure of Ni <sup>II</sup> L <sub>2</sub> <sup>BIS</sup> . |              |             |          |              |             |
|-----------------------------------------------------------------------------------------------------------|--------------|-------------|----------|--------------|-------------|
| Ligand 1                                                                                                  |              |             | Ligand 2 |              |             |
| Bond                                                                                                      | Experimental | Theoretical | Bond     | Experimental | Theoretical |
| Ni1-O2                                                                                                    | 2.046        | 2.074       | Ni1-O85  | 2.043        | 2.071       |
| Ni1-N11                                                                                                   | 2.026        | 2.084       | Ni1-N94  | 2.019        | 2.075       |
| Ni1-N23                                                                                                   | 2.143        | 2.163       | Ni1-N106 | 2.153        | 2.160       |
| C3-O2                                                                                                     | 1.286        | 1.283       | C86-O85  | 1.283        | 1.284       |
| C10-N11                                                                                                   | 1.356        | 1.360       | C93-N94  | 1.364        | 1.362       |
| C3-C4                                                                                                     | 1.447        | 1.449       | C86-C87  | 1.451        | 1.449       |
| C4-C5                                                                                                     | 1.375        | 1.380       | C87-C88  | 1.370        | 1.381       |
| C5-C7                                                                                                     | 1.426        | 1.432       | C88-C90  | 1.430        | 1.431       |
| C7-C8                                                                                                     | 1.368        | 1.379       | C90-C91  | 1.374        | 1.380       |
| C8-C10                                                                                                    | 1.429        | 1.422       | C91-C93  | 1.420        | 1.422       |
| C10-C3                                                                                                    | 1.465        | 1.468       | C93-C86  | 1.465        | 1.465       |

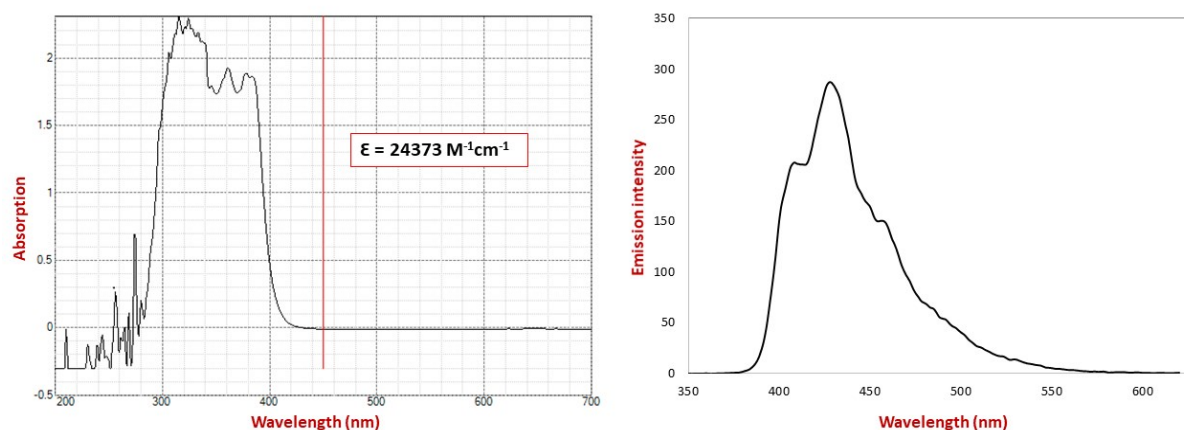

Figure S2 Absorption and emission spectrums of the 0.1mM CH<sub>2</sub>Cl<sub>2</sub> solutions of H<sub>2</sub>L<sup>BAP</sup> ligand.

The extinction coefficient value of the H<sub>2</sub>L<sup>BAP</sup> ligand which extracted by the plot of the absorption maxima at a selected wavelength 314 nm versus varied concentrations is 24373 M<sup>-1</sup>cm<sup>-1</sup>.

## Physical and spectroscopic data for selected compounds

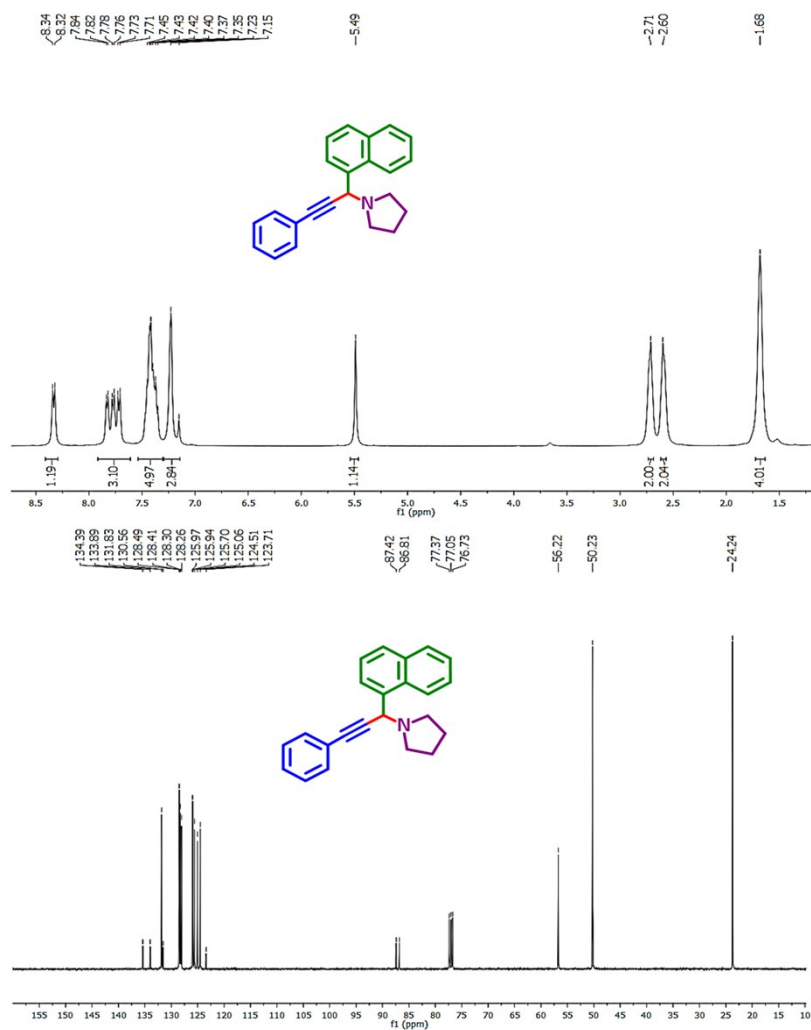

Figure S3  $^1\text{H}$  NMR and  $^{13}\text{C}$  NMR of 1-(1-(Naphthalen-1-yl)-3-phenylprop-2-yn-1-yl)pyrrolidine.

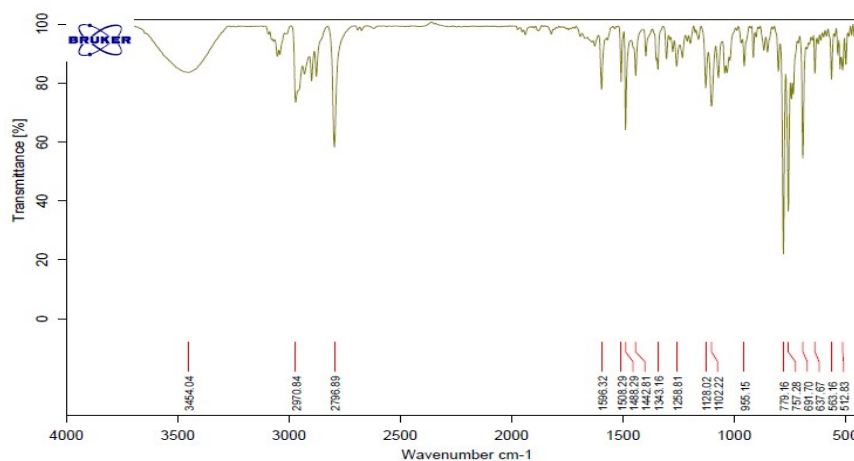

Figure S4 IR spectrum of 1-(1-(Naphthalen-1-yl)-3-phenylprop-2-yn-1-yl)pyrrolidine.

### 1-(1-(Naphthalen-1-yl)-3-phenylprop-2-yn-1-yl)pyrrolidine (**4c**)

White solid, mp = 117–118 °C,  $^1\text{H}$  NMR (400 MHz,  $\text{CDCl}_3$ , ppm):  $\delta$  8.33 (d, 8.15 Hz, 1H), 7.83 (d, 1H), 7.77 (d, 1H), 7.72 (d, 1H), 7.57–7.35 (m, 5H), 7.23 (br.s, 3H), 5.49 (s, 1H), 2.71 (s, 2H), 2.61 (s, 2H), 1.68 (s, 4H);  $^{13}\text{C}$  NMR (100 MHz,  $\text{CDCl}_3$ , ppm): 134.3, 133.8, 131.8, 130.5, 128.5, 128.4, 128.3, 128.1, 126.0, 126.0, 125.7, 125.0, 124.5, 123.7, 87.4, 86.8, 56.2, 50.2, 24.2; IR (neat)  $\nu_{\text{max}}$ : 3053, 2971, 2878, 2797, 1596, 1508, 1488, 1443, 1397, 1343, 1259, 1128, 1102, 1071, 1043, 955, 914, 851, 802, 779, 757, 692, 638, 563, 513  $\text{cm}^{-1}$ .

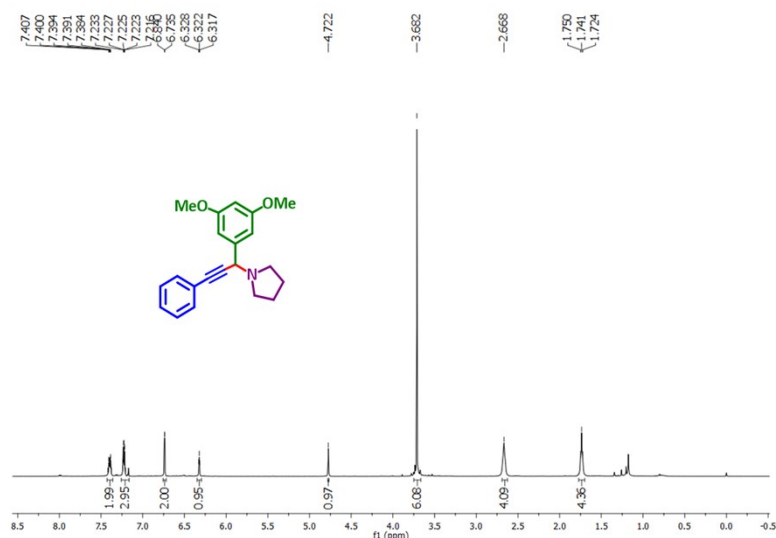

Figure S5 <sup>1</sup>H NMR of 1-(1-(3,5-Dimethoxyphenyl)-3-phenylprop-2-yn-1-yl)pyrrolidine.

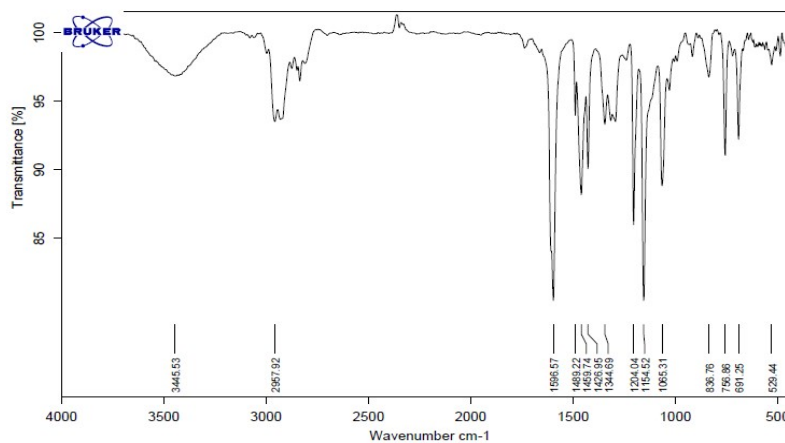

Figure S6 IR spectrum of 1-(1-(3,5-Dimethoxyphenyl)-3-phenylprop-2-yn-1-yl)pyrrolidine.

**1-(1-(3,5-Dimethoxyphenyl)-3-phenylprop-2-yn-1-yl)pyrrolidine (4d)**

Yellowish oil, <sup>1</sup>H NMR (400 MHz, CDCl<sub>3</sub>, ppm): δ 7.40–7.38 (m, 2H), 7.23–7.21 (m, 3H), 7.73 (d, 2H), 6.32 (t, 1H), 4.72 (s, 1H), 3.68 (s, 6H), 2.61–2.77 (m, 4H), 1.74 (t, 5.78 Hz, 4H); <sup>13</sup>C NMR (100 MHz, CDCl<sub>3</sub>, ppm) 160.7, 141.5, 131.8, 128.3, 128.2, 123.1, 106.4, 99.8, 87.0, 86.3, 59.3, 55.4, 50.4, 23.6, IR (neat) ν<sub>max</sub>: 3080, 2997, 2958, 2930, 2835, 1597, 1489, 1460, 1427, 1345, 1293, 1204, 1155, 1065, 1029, 917, 757, 691 cm<sup>-1</sup> (Figure S5 and Figure S6).

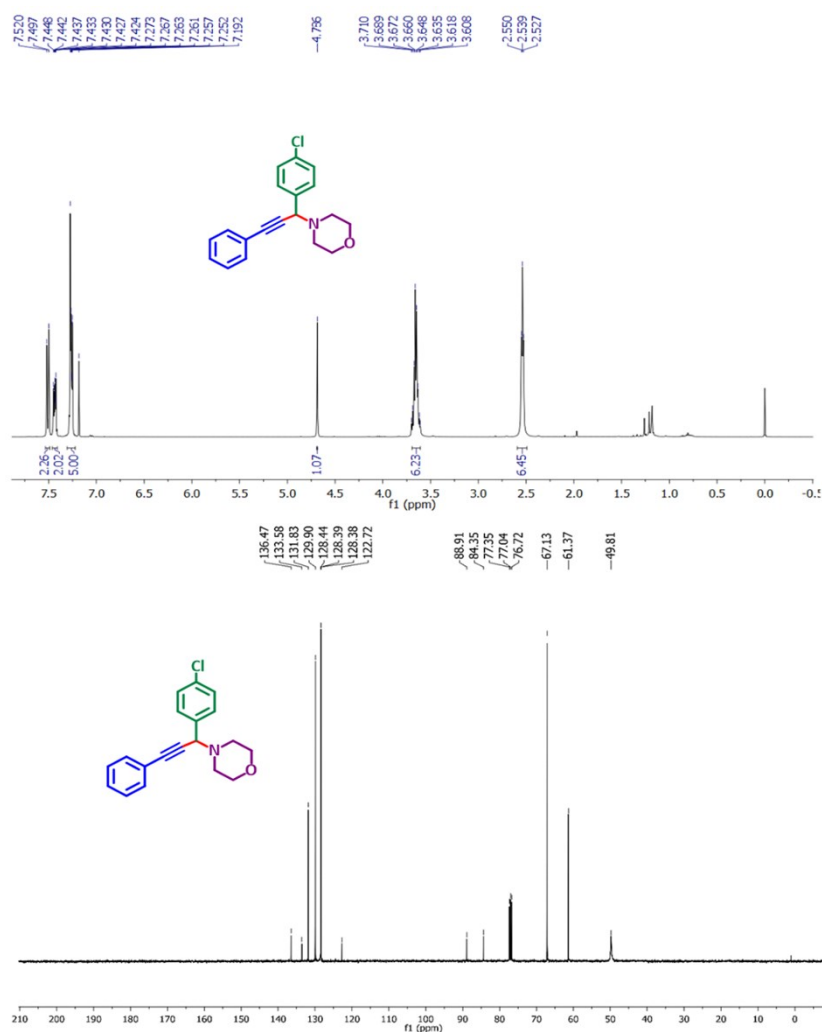

Figure S7  $^1\text{H}$  NMR and  $^{13}\text{C}$  NMR of 4-(1-(4-Chlorophenyl)-3-phenylprop-2-yn-1-yl)morpholine.

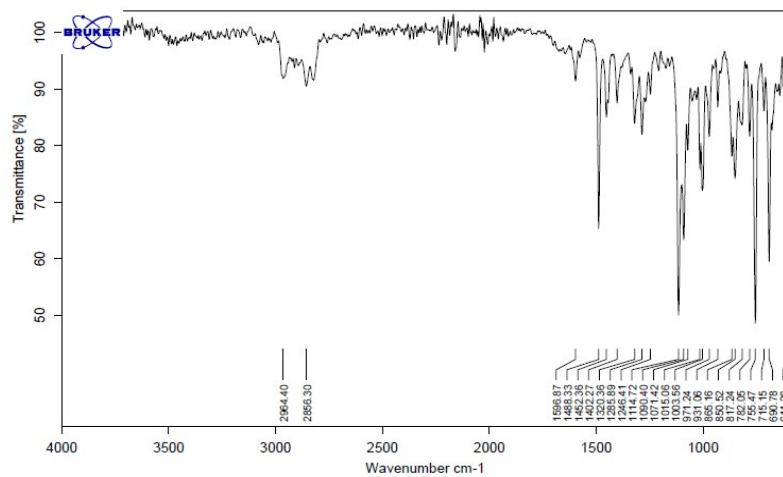

Figure S8 IR spectrum of 4-(1-(4-Chlorophenyl)-3-phenylprop-2-yn-1-yl)morpholine.

**4-(1-(4-Chlorophenyl)-3-phenylprop-2-yn-1-yl) morpholine (4f)**

Yellowish liquid,  $^1\text{H}$  NMR (400 MHz,  $\text{CDCl}_3$ , ppm):  $\delta$  7.52 (d, 2H), 7.44–7.43 (m, 2H), 7.27–7.19 (m, 5H), 4.73 (s, 1H), 3.71–3.61 (m, 4H), 2.55–2.52 (t, 4H);  $^{13}\text{C}$  NMR (100 MHz,  $\text{CDCl}_3$ , ppm) 136.5, 133.6, 131.9, 129.9, 128.44, 128.39, 128.38, 122.7, 88.9, 84.3, 67.1, 61.4, 49.8, IR (neat)  $\nu_{\text{max}}$ : 3080, 2964, 2856, 2822, 1597, 1488, 1452, 1402, 1320, 1286, 1115, 1096, 1004, 971, 851, 782, 755, 691  $\text{cm}^{-1}$  (Figure S7 and Figure S8).

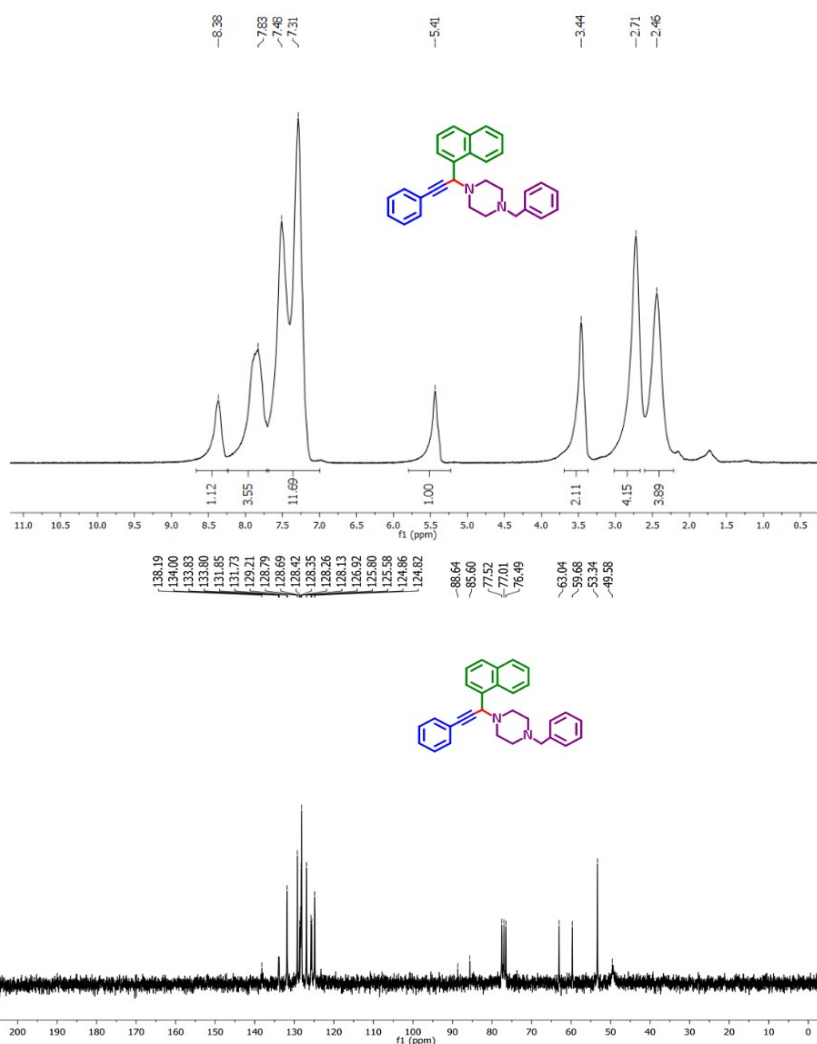

Figure S9  $^1\text{H}$  NMR and  $^{13}\text{C}$  NMR of 1-Benzyl-4-(1-(naphthalen-1-yl)-3-phenylprop-2-yn-1-yl) piperazine.

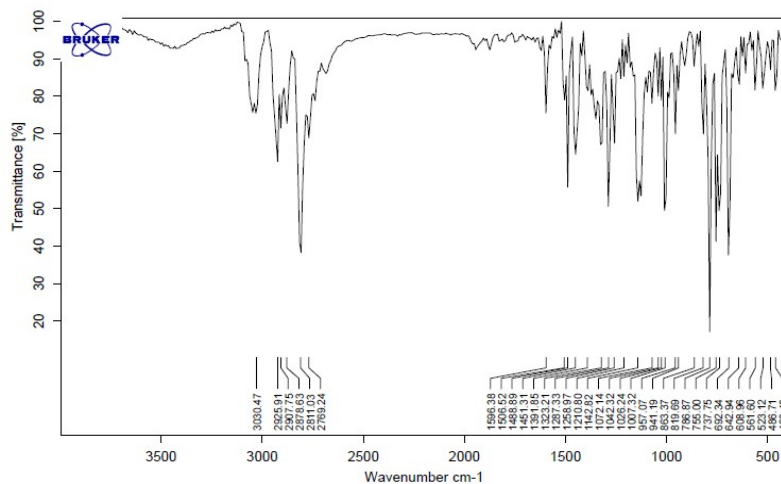

Figure S10 IR spectrum of 1-Benzyl-4-(1-(naphthalen-1-yl)-3-phenylprop-2-yn-1-yl) piperazine.

**1-Benzyl-4-(1-(naphthalen-1-yl)-3-phenylprop-2-yn-1-yl) piperazine (41)**

White solid, mp = 154–156 °C,  $^1\text{H}$  NMR (400 MHz,  $\text{CDCl}_3$ , ppm):  $\delta$  = 7.31–8.38 (m, 11H), 5.41 (s, 1H), 3.44 (br, 2H), 2.71 (br, 4H), 2.46 (br, 4H);  $^{13}\text{C}$  NMR (100 MHz,  $\text{CDCl}_3$ ): 138.19, 134.00, 133.83, 133.80, 131.85, 131.73, 129.21, 128.79, 128.69, 128.42, 128.35, 128.26, 128.13, 126.92, 125.80, 125.58, 124.86, 124.82, 88.64, 85.60, 63.04, 59.68, 53.34, 49.58; IR (neat)  $\nu_{\text{max}}$ : 3030, 2925, 2907, 2878, 2811, 2769, 1596, 1506, 1488, 1451, 1391, 1323, 1287, 1258, 1210, 1142, 1026, 1007, 957, 819, 786, 755, 692, 523  $\text{cm}^{-1}$  (Figure S9 and Figure S10).

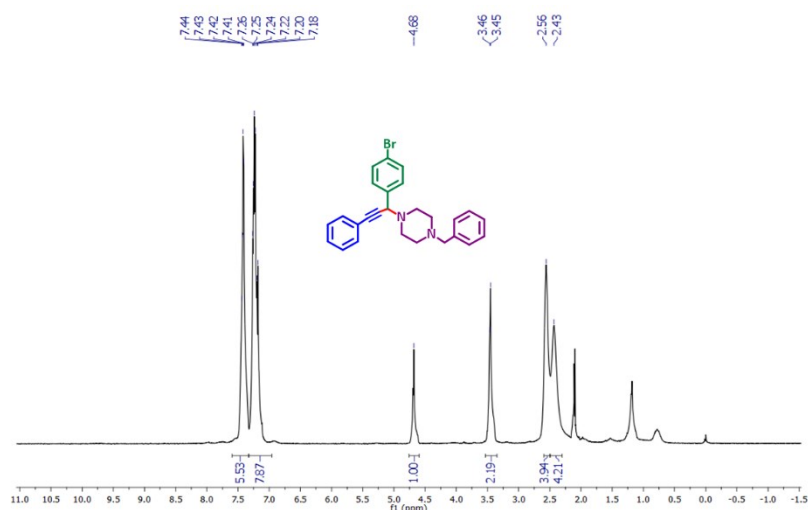

Figure S11  $^1\text{H}$  NMR of 1-benzyl-4-(1-(4-bromophenyl)-3-phenylprop-2-yn-1-yl)piperazine.

**1-benzyl-4-(1-(4-bromophenyl)-3-phenylprop-2-yn-1-yl)piperazine (4k)**

White solid, mp = 154–156 °C,  $^1\text{H}$  NMR (250 MHz,  $\text{CDCl}_3$ ):  $\delta$  (ppm) = 7.18–7.44 (m, 14H), 4.68 (s, 1H), 3.45 (br, 2H), 2.56 (br, 4H), 2.43 (br, 4H) (Figure S11).

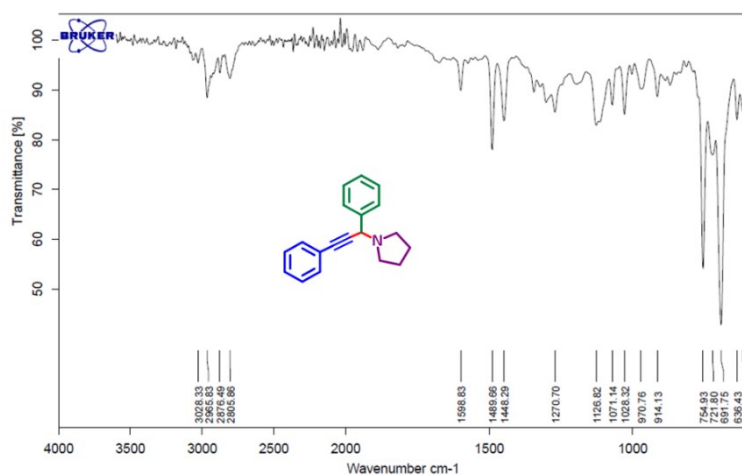

Figure S12 IR spectrum of 1-(1,3-diphenylprop-2-yn-1-yl)pyrrolidine.

**1-(1,3-diphenylprop-2-yn-1-yl)pyrrolidine (4a)**

Yellowish oil, IR (neat)  $\nu_{\text{max}}$ : 3028, 2876, 2805, 1598, 1489, 1448, 1270, 1126, 1071, 1028, 970, 914, 754, 721, 691, 636, 616  $\text{cm}^{-1}$  (Figure S12).

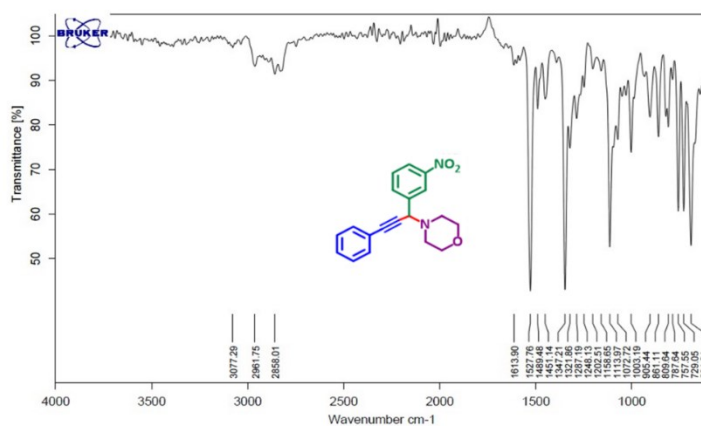

Figure S13 IR spectrum of 1-(1-(3-nitrophenyl)-3-phenylprop-2-yn-1-yl)morpholine.

**1-(1-(3-nitrophenyl)-3-phenylprop-2-yn-1-yl)morpholine (4g)**

Yellowish oil, IR (neat)  $\nu_{\text{max}}$ : 3077, 2961, 2858, 1613, 1527, 1489, 1451, 1347, 1321, 1287, 1248, 1202, 1158, 1113, 1072, 1003, 905, 861, 809, 787, 757, 729, 691  $\text{cm}^{-1}$  (Figure S13).

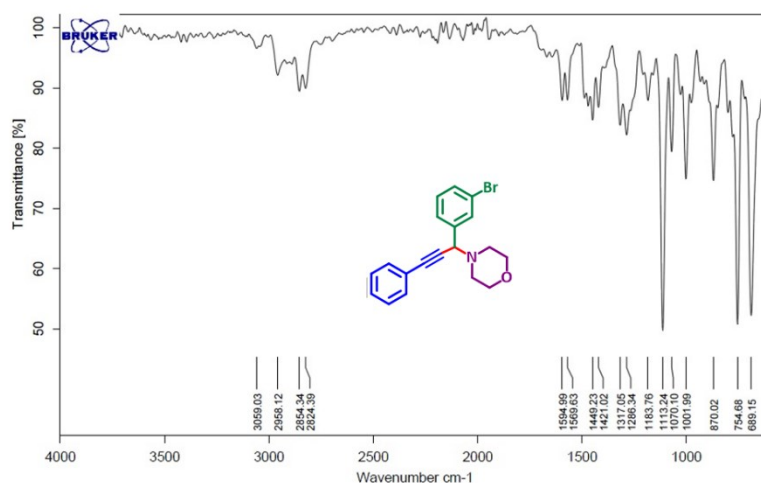

**Figure S14** IR spectrum of 4-(1-(4-Bromophenyl)-3-phenylprop-2-yn-1-yl)morpholine.

**4-(1-(4-Bromophenyl)-3-phenylprop-2-yn-1-yl)morpholine (4h)**

Yellowish oil, IR (neat)  $\nu_{\max}$ : 1594, 1569, 1449, 1421, 1317, 1286, 1183, 1113, 1070, 1001, 870, 754, 689  $\text{cm}^{-1}$  (Figure S14).

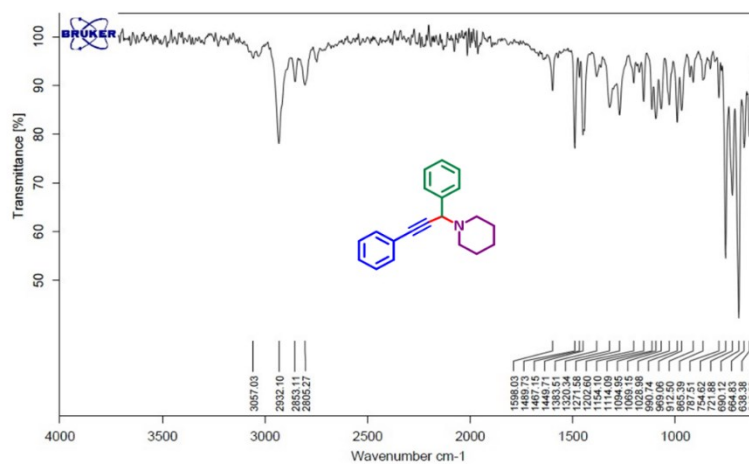

**Figure S15** IR spectrum of 1-(1,3-diphenylprop-2-yn-1-yl)piperidine.

**1-(1,3-diphenylprop-2-yn-1-yl) Piperidine (4i)**

Yellowish oil, IR (neat)  $\nu_{\max}$ : 1598, 1489, 1467, 1449, 1383, 1320, 1271, 1202, 1154, 1114, 1094, 1069, 1028, 990, 969, 912, 865, 787, 754, 721, 690, 664, 638, 616  $\text{cm}^{-1}$  (Figure S15).

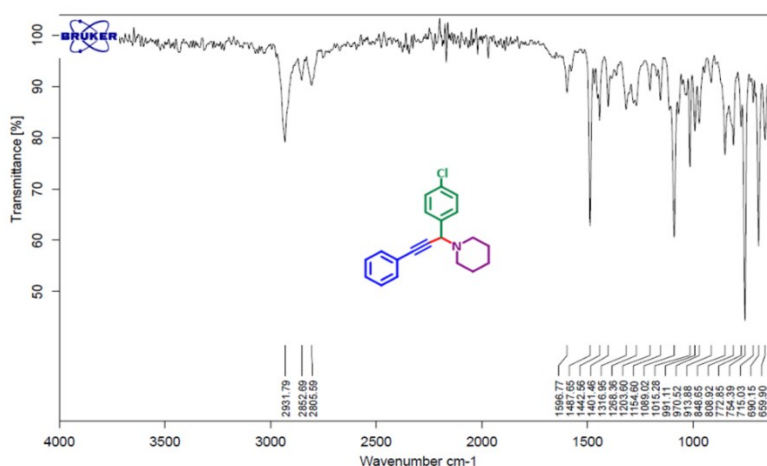

**Figure S16** IR spectrum of 4-(1-(4-Chlorophenyl)-3-phenylprop-2-yn-1-yl)piperidine.

**4-(1-(4-Chlorophenyl)-3-phenylprop-2-yn-1-yl)piperidine (4j)**

Yellowish oil, IR (neat)  $\nu_{\max}$ : 1596, 1487, 1442, 1401, 1316, 1268, 1203, 1154, 1089, 1015, 991, 970, 913, 848, 808, 772, 754, 715, 690, 659, 613  $\text{cm}^{-1}$  (Figure S16).
